# Supplementary material
Source: Research Square preprint supplement (doi:10.21203/rs.3.rs-9085595/v1)
Supplement: Supplementary file 1 [file 759a579b96fff9225e549cd4.xlsx]

## Sheet: 总表1
No	Mother Age Info	Mother Age (years)	Obstetric history and Parental medical history	Sex	Prenatal US findings							Gene / Variant	Variant (HGVS)	Inheritance	Other imaging	Pregnancy outcome	Postnatal phenotype												Child's outcome
					GA at diagnosis (weeks)	CNS anomalies	CVS anomalies	Genitourinary anomalies	Nuchal translucency	Amniotic fluid abnormalities	Other anomalies						(Facial abnormalities)	CNS anomalies	CVS anomalies	Respiratory system anomalies	Gastrointestinal anomalies	Genitourinary anomalies	Limb and nail anomalies	Ophthalmological Abnormalities	Other anomalies	Hearing loss	Neurodevelopmental Disorders	feeding difficulties
1	Keskinen et al. (2023)	38	G1P0	Male	12–17w	ACSP	Functional Single Ventricle	—	5.5	—	bilateral clubfoot	SMARCB1	c.1066_1067del, p.(Leu356AspfsTer4)	de novo	NR	TOP (17w)	hypertelorism, swollen orbitas, broad and depressed nasal bridge, full lips, wide mouth, micrognathia and low-set posteriorly rotated ears	ACSP, Frontal lobe hypoplasia	Severe RV hypoplasia + VSD + TA(type III) + PLSVC + IVC	—	—	—	Fifth digit nail or distal phalanx hypoplasia/aplasia	NA	Cleft palate，Narrow waist, upper limb pterygia, short lower limbs, hypoplastic thymus, bilateral olfactory nerve aplasia	NA	NA	NA	TOP at 17w
2	Keskinen et al. (2023)	32	G5P1	Male	20+6w	ACSP, enlarged posterior fossa, widened lateral ventricles	—	—	—	—	—	ARID1A	c.1920+3_1920+6del	de novo	MRI: ACSP, suspected cerebellar hypoplasia or mega cisterna magna	TOP	micrognathia, hypertelorism, broad nasal tip, anteverted nares and broad philtrum	ACC, hydrocephalus and a Dandy-Walker malformation	—	—	—	—	—	NA	—	NA	NA	NA	TOP
3	Jing et al. (2023)	36	G2P1	Male	12w	—	—	—	—	—	CDH	ARID2	NM_152641.4: c.1609delG, p.(Asp537Ilefs*20)	de novo	NR	TOP (15w)	Low-set ears, hypertelorism, micrognathia	—	—	—	—	—	—	NA	CDH	NA	NA	NA	TOP (15w)
4	Rimoldi et al. (2023)	NR	NR	NR	20w	hypoplastic corpus callosum, cerebellar transverse diameter at 5th centile	Right lateral ventricle at the upper limit of normal	—	—	—	—	SMARCA4	NM_001128849.2: c.3557C>T, p.(Ala1186Val)	de novo	NR	TOP	macrocephaly, low-set ears, depressed nasal bridge	HCC	—	—	—	—	camptodactyly	NA	—	NA	NA	NA	TOP
5	Sun et al. (2022)	28	NR	NR	24w	—	TOF	—	—	—	—	SMARCC2	NM_003075.5: c.3561del, p.(Leu1188fs) (de novo heterozygous frameshift variant)	de novo	NR	TOP	NR	NR	NR	NR	NR	NR	NR	NR	NR	NA	NA	NA	TOP
6	Zarate et al. (2016)	NR	NR	Female	NR	—	Suspected AV canal defect	—	—	—	IUGR	SMARCE1	c.218A>G, p.(Tyr73Cys) – Located in exon 5 (parental studies not conducted)	de novo	NR	Live birth (37 w)	high arched palate, retromicrognathia, sacral dimple/hemangioma, sparse scalp hair, nystagmus, abnormal dentition	—	PDA, ASD	—	—	Absent nails on great toes	absent nails on great toes	—	IUGR，13 ribs bilaterally,	+	+	+	Alive at report
7	Miyake et al. (2016)	30	NR	Female	NR	—	—	—	—	—	IUGR	SMARCA2	der(6)t(6;9)(p25;p21)mat	Inherited from mother with balanced translocation (46,XX,t(6;9)(p25;p21))	X ray: small terminal phalanges of 5th fingers	Live birth (37 w)	long eyelashes, partial ptosis, wide nose, short philtrum, cupped ears, high palate,	—	—	—	—	—	clinodactyly & camptodactyly of fingers, small 5th finger/toenails	—	non-functioning tear ducts,	—	+	—	Alive with follow-up (6 years old at report)
8	Virginia Miraldi Utz et al. (2020)	27	G1P0	Female	NR	—	—	left ureteropelvic junction obstruction, mild right renal pelviectasis	—	Polyhydramnios	bilateral post-axial polydactyly	ARID1A	c.169 G>T; p.Glu57* (E57X)	de novo	HCC, Cerebellar dysplasia, MCD, entral brainstem cleft, Chronic PVG	Live birth at 37 w	Macrocephaly, supernumerary mandibular central incisor, thick/long eyelashes	—	—	—	—	left ureteropelvic junction obstruction	bilateral post-axial polydactyly	accommodative esotropia, hyperopia,cortical visual impairment,	hypotonia,	—	autism spectrum disorder	—	Alive with follow-up (7 years old at report)
9	LaBrecque et al. (2019)(Monochorionic-diamniotic twins)	35	G3P0	Female (Twin A)	NR	Borderline unilateral ventriculomegaly	—	—	—	—	Twin A: Velamentous cord insertion, Vasa previa	ARID1A	Chr1:27094442 C>A; c.3150C>A; p.Asp1050Glu (D1050E)	De novo	MRI Unilateral ventriculomegaly, PACC	Live birth at 30+2w	hypoplastic ears, large forehead, high hairline	mild hydrocephalus	ASD, VSD,significant pulmonary hypertension.	severe chronic lung disease	—	Mild bilateral renal pyelectasis	—	retinopathy	CDH, laryngomalacia	—	+	+	Alive at report
10	LaBrecque et al. (2019)(Monochorionic-diamniotic twins)		NR	Female (Twin B)	NR	Borderline unilateral ventriculomegaly	—	—	—	Polyhydramnios	Twin B: Polyhydramnios, Vasa previa	ARID1A	Chr1:27094442 C>A; c.3150C>A; p.Asp1050Glu (D1050E)	De novo	MRI：Partial agenesis of corpus callosum	Live birth at 30+2w	very mild coarse features, dysplastic ears with prominent anthelix,	—	ASD, VSD, RV dilation/hypertrophy, pulmonary hypertension	—	—	duplicated left renal collecting system	an elongated third digit on the right hand,	retinopathy	mild laryngomalacia	—	NA	—	Alive at report
11	Veazey et al. (2024)	32	G2P0	Male	17+5w	—	—	—	—	—	IUGR, abnormal umbilical artery flow	SMARCD1	c.908G>C p.(Arg303Pro)	De novo	NR	Intrauterine fetal demise at 21+3 w	Frontal bossing, hypertelorism, midface retrusion, long philtrum, retrognathia, low-set posteriorly rotated ears, unilateral overfolded helix	NA	NA	NA	NA	NA	ambiguous genitalia, micropenis, Unilateral hand distal clenching	NA	NA	NA	NA	NA	Stillbirth
12	Dsouza et al. (2019)	33	G4P3	Male	NR	—	CAVSD with cleft mitral valve, aortic root hypoplasia	—	—	—	Single umbilical artery	SMARCA4	(NM_001128849 .1 c.2647G>A，p. Gly883Ser)	De novo	NR	Live birth at 39w	Coarse facial features, sparse bitemporal scalp hair, wide mouth with thick lips, thick eyebrows, low-set and posteriorly rotated ears	—	CAVSD, post-op progressive fibrotic subaortic stenosis, severe mitral regurgitation	—	—	—	Fifth digit distal hypoplasia with nail aplasia/hypoplasia of hands and feet	—	Obstructive sleep apnea	+	+	—	Alive at report
13	Ding et al. (2022)	NR	NR	Male	—	—	—	—	—	—	IUGR	SOX11	c.425C>G, p.Ala142Gly (A142G)	de novo	MRI：Thin and oblate pituitary gland	term live birth	Prominent forehead, arched eyebrows, flat nasal bridge, broad nose, low-set ears, short philtrum, micrognathia，Sparse scalp hair, high hairline	Thin and oblate pituitary gland	—	—	—	—	Clinodactyly of 5th finger, finger joint laxity	—	Left cryptorchidism	—	+	—	Alive at report
14	Diets et al. (2019)	NR	NR	Female	NR	mild ventriculomegaly	—	—	—	—	—	SMARCB1	c.110G>A p.Arg37His	De novo	MRI: Hydrocephalus with choroid plexus hyperplasia, Thin corpus callosum, Hippocampal atrophy	Live birth at 37w	NA	Hydrocephalus, choroid plexus hyperplasia, HCC, hippocampal atroph	Bicuspid aortic valve, Mild aortic dilation, ASD	—	—	Vesicoureteral Reflux, kidney stones	—	Vert. INO, OD cataract & RRD, OS hyphema	Musculoskeletal: Persistent knee dislocation, Positional foot deformities; Precocious puberty,obstructive sleep apnea	—	+	+	died at 6 years
15	Diets et al. (2019)	NR	NR	Female	NR	borderline enlarged cerebral ventricles	—	—	—	—	polyhydramnios	SMARCB1	c.110G>A p.(Arg37His)	De novo	MRI: hydrocephalus, choroid plexus hyperplasia, foreshortened corpus callosum	Live birth at 39w	Hypotonic facies, midface hypoplasia, tongue protrusion	Hydrocephalus	VSD,PDA	—	Ectopic appendix	hydronephrosis	—	Poor visual tracking, Myopia,	sleep apnea,Laryngotracheomalacia, partial vocal cord paralysis, Hypotonia, Joint hypermobility, Congenital hip dysplasia, ITP,obstructive sleep apnea	+	+	+	Alive at report (17months)
16	Smith et al. (2016)	29	NR	Female	32w	—	—	—	—	—	short limbs	ARID1B	c.1259delA p.(Asn420Ilefs*10)	De novo	NR	Live birth at 31w	Prominent nose, full nasal tip, long philtrum, high-arched palate, prominent lower lip, low posterior hairline	—	—	—	—	—	prominence of PIP joints, small 5th toenails	—	Single transverse palmar crease (R), Severe growth hormone deficiency, vertebral anomalies	—	+	—	Alive at report (21 years)
17	Smith et al. (2016)	20	G1P0	Male	32w	ventriculomegaly	—	—	—	—	—	ARID1B	c.1259delA p.(Asn420Ilefs*10)	Inherited from affected mother (son)	MRI : agenesis of corpus callosum, colpochepathy, possible arachnoid cyst	Live birth at 37W	Prominent forehead, full nasal tip, anteverted nares, long philtrum, high-arched palate, prominent lower lip, sparse hair	HCC, Prominent posterior fossa space, possible arachnoid cyst in cisterna magna	—	—	—	—	a short left second toe, and mild fifth toe clinodactyly	—	hypotonia,Excess skin at nape, mild pectus excavatum	—	+	—	Alive at report (21 months)
18	Cárcamo et al. (2022)	32	G5P2	NR	NR	—	—	—	—	Oligohydramnios	—	ARID1A	c.6182T>C; p.Leu2061Ser, variant + somatic CTNNB1 (p.Gly34Val)	De novo	MRI:HCC, Dandy-Walker variant, absent posterior pituitary, cerebellar vermis hypoplasia, hepatoblastoma; MRA: bilateral internal carotid artery hypoplasia; Echocardiogram: ASD, VSD, pulmonary hypertension;	Live birth at 40w	Forehead melanocytic nevus, broad eyebrows, long eyelashes, mild ptosis, strabismus, depressed nasal bridge, anteverted nares, thick alae nasi, broad philtrum, thick vermilion borders, squared ears, hypoplastic helix.	HCC, Dandy-Walker variant, absent posterior pituitary, thick alae nasi	ASD, VSD, pulmonary hypertension	—	chronic constipation	—	hypoplastic 5th fingernail	—	infantile spasms, hypotonia, hepatoblastoma	—	+	+	Alive at ≥24 months
19	Goffin et al., 2022	NR	father: history of VSD	Female	16w	—	Atrial Septal Defect (ASD)	—	—	—	CDH	ARID1A	c.98_107del, p.(Glu33Glyfs*15)	(paternal)	Brain MR: cerebral volume loss, dysplastic corpus callosum, subdural hematoma, pars intermedia/Rathke cleft cyst, tortuous vessels, skull thickening	Live birth at 36+5 w	sparse hair, bitemporal narrowing, coarse facies, broad eyebrows, ptosis, a flat nasal bridge, a broad nose, anteverted nares, a thin upper vermilion, and a thick lower vermilion	Mild-mod cerebral volume loss, prominent ventricles, borderline dysplastic CC, chronic subdural hematoma, Rathke cleft cyst	ASD	Chronic respiratory failure	—	—	Fifth fingers mildly short, normal nails	—	umbilical hernia	—	+	—	Alive at report( 20 months)
20	Goffin et al., 2022	NR	NR	Male	NR	—	—	—	—	Oligohydramnios	—	SMARCA4	c.2936G>A, p.(Arg979Gln)	de novo	—	Live birth at 34w	—	partial corpus callosum agenesis	—	—	malrotation	Hypospadias, non-palpable L testis, R hydrocele	—	hypermetropia	Left-sided CDH, low-lying conus, seizures ,a hard palate cleft, hypotonia	+	+	+	Alive at report (3 years)
21	Goffin et al., 2022	NR	NR	Female	NR	—	—	—	—	—	left-sided CDH	SMARCA4	c.3595G>A, p.(Val1199Met)	de novo	Brain MRI: short corpus callosum, prominent ventricles, thin optic nerves	Live birth at 37w	/	—	—	—	pyloric stenosis	—	—	—	Left CDH, specific antibody deficiency, very-early-onset IBD, sleep difficulties	+	+	—	Alive at report (6 years)
22	Goffin et al., 2022	NR	NR	Female	NR	—	AV canal defect	—	—	—	IUGR	SMARCE1	c.218A>G, p.(Tyr73Cys)	de novo	NR	Live birth at 37w	Dysmorphic features	—	AV canal defect	—	—	—	hypoplastic 5th digits/nails	—	Morgagni-type CDH	—	+	—	Alive at report (6 years)
23	Alharbi et al. (2024)	NR	NR	Female	NR	Mega cisterna magna	—	—	—	—	Mild IUGR	ARID1B	c.5227_5228insCA, p.(Leu1743ProfsTer12)	de novo	Brain MRI: Mega cisterna magna	term live birth	slightly coarse facies, wide-set eyes, sparse anterior scalp hair	Mega cisterna magna	—	—	Anteriorly placed anus associated with anoperineal fistula	—	hypoplastic distal phalanx of the 5th fingers	unilateral exotropia	bicornuate uterus, hypotonia	—	+	+	Alive at report (4 years)
24	Tanaka et al. (2025)	30	G1P0	Female	19+2w	Severe hydrocephalus, cerebellar hypoplasia	—	—	—	—	—	ARID1A	c.5259_5262dupGTCT, p.(Ser1755Valfs*2)	de novo	NR	TOP (21w)	Low-set ears, thin upper lip, thick lower lip	—	NR	NR	NR	NR	short fifth fingers	NA	NA	NA	NA	NA	TOP (21w)
25	Slavotinek et al. (2022)	19	G1P0, seizures (treated with levetiracetam)	Male	26w	Cerebral ventriculomegaly, ACC, cystic dilation of the posterior fossa	—	—	—	polyhydramnios	Right-side CDH, kyphoscoliosis of the thoracolumbar spine, a hypocoiled umbilical cord	ARID1A	Mosaic del 1p36.11	de novo	NR	Live birth at 32w	downslanting palpebral fissures, widely-spaced eyes, a flat nasal bridge with an upturned nasal tip, relatively small, low-set	ACC, ventriculomegaly, focal cerebellar hypoplasia	—	Lung hypoplasia (right)	Imperforate Anus	—	hypoplastic nails	NA	Right-sided CDH, kyphoscoliosis, single umbilical artery	NA	NA	NA	died at 4 days
26	Slavotinek et al. (2022)	36	G0P0 , vitro fertilization	Male	23+5w	severe hydrocephalus	—	—	—	—	—	ARID1A	c.4860dup; p.Pro1621Thrfs*27	de novo	NR	TOP(23+5w)	Wide-spaced eyes, flat nasal bridge, low-set/dysplastic ears, long philtrum, macrostomia, thick lips	ACC, cerebellar hypoplasia, hypoplasia of the olfactory bulbs and defects of neural migration and cerebral white matter	—	lung lobulation defects	—	renal dysplasia	5th finger clinodactyly	—	heterotaxy, single umbilical artery	NA	NA	NA	Termination of Pregnancy (TOP at 23w5d)
27	Slavotinek et al. (2022)	34	NR	Female	21w	bilateral hydrocephalus with ACC, agenesis of the cerebellar vermis	VSD, aberrant SVC	—	—	—	—	ARID1A	c.4886dup; p.Val1630Cysfs*18	de novo	NR	TOP at 21w	malar hypoplasia, a short nose with anteverted nares and a long philtrum with downturned corners of the mouth, low-set ears	hydrocephalus, hypoplasia of the cerebellar vermis and ACC with Probst bundles	CAVC with anomalous SVC drainage to CS	pulmonary lobulation defects	—	Non-visualized bladder, anteriorly placed anus	shortened digits with 5th finger clinodactyly & small nails	retinal dysplasia	cleft palate, thymic absence	NA	NA	NA	TOP at 21w
28	Slavotinek et al. (2022)	34	history of multiple, early pregnancy losses	Male	13+1w	occipital encephalocele	—	—	3.8	—	—	ARID1A	c.175G>T; p.Glu59*	de novo	omphalocele	TOP ( 14w )	NA	NR	NA	NA	NA	NA	NA	NA	NA	NA	NA	NA	TOP at 14w
29	Lefebvre M, et al. (2020)	NR	NR	Male	22w	Hydrocephalus	—	—	—	—	—	ARID1A	c.4860dup, p.(Pro1621Phefs*2)	De Novo	Lymphangioma	TOP (22w)	NR	Severe hydrocephaly, ACC, Heterotaxia	_	NA	NA	NA	NA	NA	NA	NA	NA	NA	Termination of Pregnancy (TOP) 22w
30	Lefebvre M, et al. (2020)	NR	NR	Male	31w	ACC	—	—	—	—	—	SMARCE1	c.276G>C, p.(Lys92Asn)	De Novo	IUGR	TOP (24w)	NR	ACC, Arhimencephaly	complex cardiopathy	NA	NA	NA	NA	NA	NA	NA	NA	NA	Termination of Pregnancy (TOP) 24w
31	Bourchany A, et al. (2017)	NR	NR	Male	NR	ACC, severe hydrocephalus	—	—	—	—	—	ARID1A	c.4859_4860insAA, p.(Pro1621Thrfs*27) (de novo)	De Novo	Short long bones, single umbilical artery	Stillbirth	NR	ACC severe hydrocephalus	NR	NA	NR	NR	NR	NR	NR	NA	NA	NA	Stillbirth
32	Jacquemin V, et al. (2023)	NR	NR	Male	NR	Hydrocephalus with dilatation of the 3rd ventricle	—	—	—	—	—	ARID1A	c.6435delG, p.(Glu2145fs)	de novo	NR	TOP	NR	Hydrocephalus, aqueductal stenosis, ACC	—	—	—	—	—	NA	NR	NA	NA	NA	Termination of Pregnancy (TOP)
Abbreviation	Full Term in English
GA	Gestational Age
US	Ultrasound
MRI	Magnetic Resonance Imaging
MRA	Magnetic Resonance Angiography
NR	Not Reported
NA	Not Available / Not Applicable
TOP	Termination of Pregnancy
CNS	Central Nervous System
ACSP	Agenesis of the Corpus Callosum
ACC	Agenesis of the Corpus Callosum
HCC	Hypoplasia of the Corpus Callosum
PACC	Partial Agenesis of the Corpus Callosum
DWM	Dandy-Walker Malformation
PVG	Periventricular Gray Matter
MCD	Malformation of Cortical Development
CVS	Cardiovascular System
RV	Right Ventricle
VSD	Ventricular Septal Defect
ASD	Atrial Septal Defect
PDA	Patent Ductus Arteriosus
TA	Tricuspid Atresia
TOF	Tetralogy of Fallot
CAVSD	Complete Atrioventricular Septal Defect
AVSD	Atrioventricular Septal Defect
PLSVC	Persistent Left Superior Vena Cava
IVC	Inferior Vena Cava
SVC	Superior Vena Cava
CS	Coronary Sinus
IUGR	Intrauterine Growth Restriction
CDH	Congenital Diaphragmatic Hernia
del	Deletion
dup	Duplication
fs	Frameshift
ter	Termination (stop codon)
Vert. INO	Vertical Internuclear Ophthalmoplegia
OD	Oculus Dexter
OS	Oculus Sinister
RRD	Rhegmatogenous Retinal Detachment
ITP	Idiopathic Thrombocytopenic Purpura
IBD	Inflammatory Bowel Disease
Reference
Keskinen S, Paakkola T, Mattila M, et al. Prenatal Coffin-Siris Syndrome: Expanding the Phenotypic and Genotypic Spectrum of the Disease. Pediatr Dev Pathol. 2024;27(2):181-186.
Jing XY, Zhen L, Lin XM, Li DZ. First-trimester prenatal diagnosis of Coffin-Siris syndrome-related congenital diaphragmatic hernia: The role of exome sequencing in determining genetic etiology. Congenit Anom (Kyoto). 2023;63(6):211-213.
Rimoldi M, Rinaldi B, Villa R, et al. Congenital diaphragmatic hernia in Coffin Siris syndrome: Further evidence from two cases. Am J Med Genet A. 2023;191(2):605-611.
Sun H, Zhang S, Wang J, et al. Expanding the phenotype associated with SMARCC2 variants: a fetus with tetralogy of Fallot. BMC Med Genomics. 2022;15(1):40. Published 2022 Mar 3.
Zarate YA, Bhoj E, Kaylor J, et al. SMARCE1, a rare cause of Coffin-Siris Syndrome: Clinical description of three additional cases. Am J Med Genet A. 2016;170(8):1967-1973.
Miyake N, Abdel-Salam G, Yamagata T, et al. Clinical features of SMARCA2 duplication overlap with Coffin-Siris syndrome. Am J Med Genet A. 2016;170(10):2662-2670.
Miraldi Utz V, Brightman DS, Sandoval MA, Hufnagel RB, Saal HM. Systemic and ocular manifestations of a patient with mosaic ARID1A-associated Coffin-Siris syndrome and review of select mosaic conditions with ophthalmic manifestations. Am J Med Genet C Semin Med Genet. 2020;184(3):644-655.
LaBrecque B, Contreras M, Giordano J, Parravicini E. Phenotypic Variation between Monochorionic Diamniotic Twins with Coffin-Siris Syndrome. J Pediatr Genet. 2019;8(4):218-221.
Veazey RA, Fisher AJ, Talati AN, Hardisty E, Gilmore KL, Vora NL. Novel Missense Variant in the SMARCD1 Gene as the Cause of Coffin-Siris Syndrome 11 in a Fetus With Ambiguous Genitalia and Multiple Dysmorphic Features. Prenat Diagn. 2024;44(12):1522-1525.
Dsouza NR, Zimmermann MT, Geddes GC. A case of Coffin-Siris syndrome with severe congenital heart disease and a novel SMARCA4 variant. Cold Spring Harb Mol Case Stud. 2019;5(3):a003962.
Ding Y, Chen J, Tang Y, et al. Identification and functional analysis of novel SOX11 variants in Chinese patients with Coffin-Siris syndrome 9. Front Genet. 2022;13:940776. Published 2022 Jul 22.
Diets IJ, Prescott T, Champaigne NL, et al. A recurrent de novo missense pathogenic variant in SMARCB1 causes severe intellectual disability and choroid plexus hyperplasia with resultant hydrocephalus. Genet Med. 2019;21(3):572-579.
Smith JA, Holden KR, Friez MJ, Jones JR, Lyons MJ. A novel familial autosomal dominant mutation in ARID1B causing neurodevelopmental delays, short stature, and dysmorphic features. Am J Med Genet A. 2016;170(12):3313-3318. d
Cárcamo B, Masotto B, Baquero-Vaquer A, Ceballos-Saenz D, Zapata-Aldana E. "Cancer in ARID1A-Coffin-Siris syndrome: Review and report of a child with hepatoblastoma". Eur J Med Genet. 2022;65(11):104600.
Gofin Y, Zhao X, Gerard A, et al. Evidence for an association between Coffin-Siris syndrome and congenital diaphragmatic hernia. Am J Med Genet A. 2022;188(9):2718-2723.
Alharbi R, Suchet-Dechaud A, Harzallah I, Touraine R, Ramond F. Expanding the clinical spectrum of Coffin-Siris syndrome with anorectal malformations: Case report and review of the literature. Eur J Med Genet. 2024;69:104948.
Tanaka Y, Yamada M, Miya F, et al. ARID1A gene variants and fetal hydrocephalus: First evidence of mRNA decay escape. Eur J Med Genet. 2025;78:105048.
Slavotinek A, Lefebvre M, Brehin AC, et al. Prenatal presentation of multiple anomalies associated with haploinsufficiency for ARID1A. Eur J Med Genet. 2022;65(2):104407.
Lefebvre M, Bruel AL, Tisserant E, et al. Genotype-first in a cohort of 95 fetuses with multiple congenital abnormalities: when exome sequencing reveals unexpected fetal phenotype-genotype correlations. J Med Genet. 2021;58(6):400-413.
Bourchany A, Thauvin-Robinet C, Lehalle D, et al. Reducing diagnostic turnaround times of exome sequencing for families requiring timely diagnoses. Eur J Med Genet. 2017;60(11):595-604.
Jacquemin V, Versbraegen N, Duerinckx S, et al. Congenital hydrocephalus: new Mendelian mutations and evidence for oligogenic inheritance. Hum Genomics. 2023;17(1):16.
